# Supplementary material for: Efficient and nontoxic biomolecule delivery to primary human hematopoietic stem cells using nanostraws
Source: PubMed Central journal article supplement — Proc Natl Acad Sci U S A. 2020 Aug 17;117(35):21267–73. doi: 10.1073/pnas.2001367117 (PMC7474688; doi:10.1073/pnas.2001367117), 2020-08-17
Supplement: pnas.2001367117.sapp.pdf [file pnas.2001367117.sapp.pdf]

# PNAS

www.pnas.org

Supplementary Information for

**Efficient and non-toxic biomolecule delivery to primary human hematopoietic stem cells using nanostraws**

Ludwig Schmiderer<sup>1</sup>, Agatheeswaran Subramaniam<sup>1</sup>, Kristijonas Žemaitis<sup>1</sup>, Alexandra Bäckström<sup>1</sup>, David Yudovich<sup>1</sup>, Svetlana Soboleva<sup>1</sup>, Roman Galeev<sup>1</sup>, Christelle N. Prinz<sup>2</sup>, Jonas Larsson<sup>1,\*</sup>, Martin Hjort<sup>2,3,4,\*</sup>

<sup>1</sup> Division of Molecular Medicine and Gene Therapy, Department of Laboratory Medicine and Lund Stem Cell Center, Lund University, 221 00 Lund, Sweden

<sup>2</sup> Division of Solid State Physics and NanoLund, Lund University, 221 00 Lund, Sweden

<sup>3</sup> Navan Technologies Inc., MBC Biolabs, 733 Industrial Rd, San Carlos, CA 94070, USA

<sup>4</sup> Present Address: Chemical Biology and Therapeutics, Department of Experimental Medical Science, Lund University, 221 00 Lund, Sweden

\*J.L. and M.H. contributed equally to this work.

**Corresponding authors:** Jonas Larsson, Martin Hjort  
**Email:** jonas.larsson@med.lu.se, martin.hjort@med.lu.se

**This PDF file includes:**

Figures S1 to S4

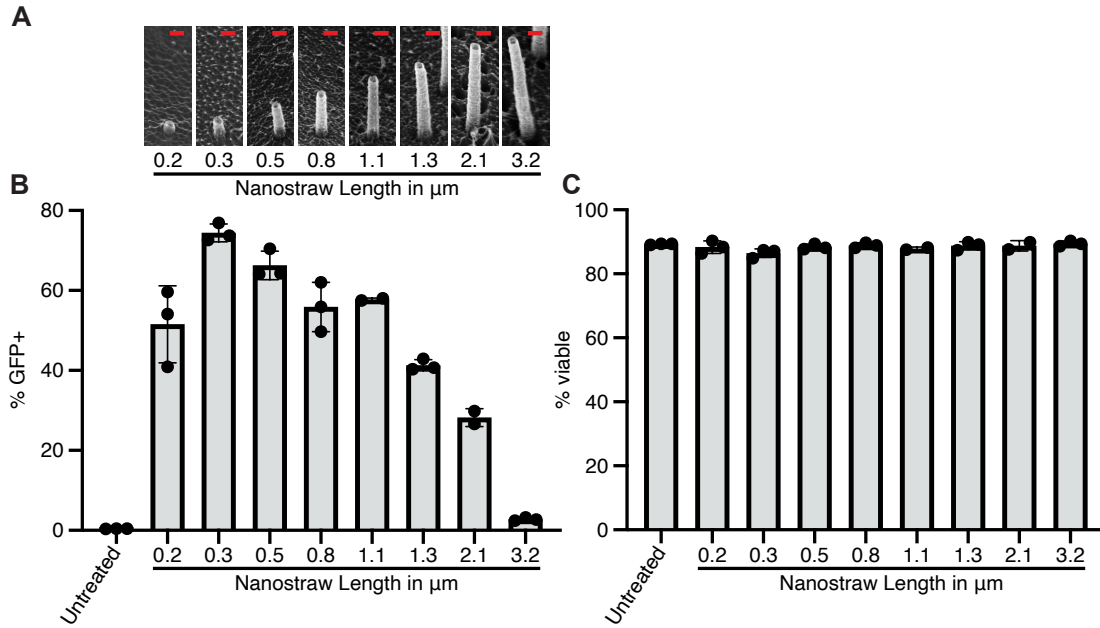

**Figure S1.** Effect of nanostraw length and cargo size on delivery efficiency. (A) 30° tilted view SEM images of nanostraws of different lengths. Scalebars denote 200 nm. (B) Percentage of GFP+ and (C) viability (7AAD- & Annexin V-) of HSPCs 1 day after mRNA delivery using differently sized nanostraw (n = 2-3).

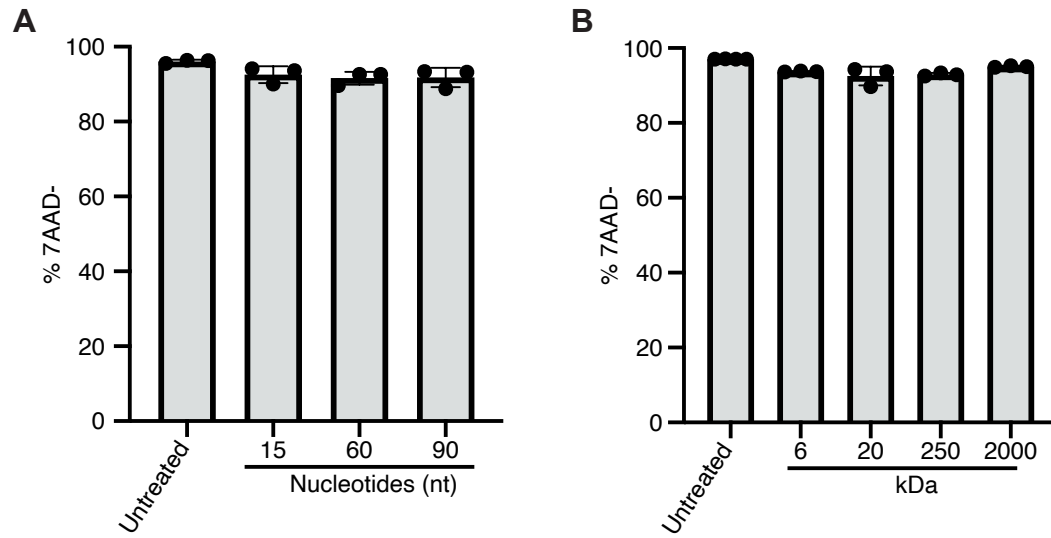

**Figure S2.** Percentage of live (7AAD-) HSPCs immediately after they were subjected to CeNT mediated delivery of (A) DNA oligonucleotides and (B) dextrans of different sizes (n = 3).

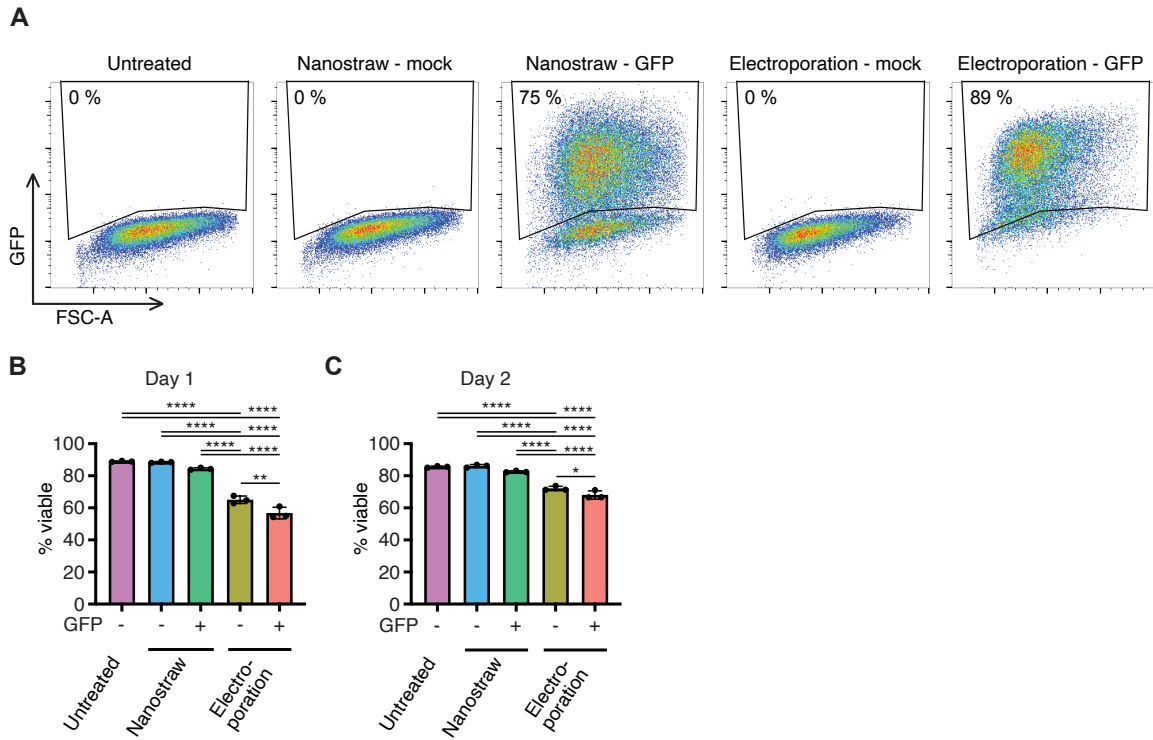

**Figure S3.** (A) Representative FACS plots of live CD34<sup>+</sup> cells treated with different mRNA or mock conditions. (B) Percentage of viable (7AAD<sup>-</sup> and Annexin V<sup>-</sup>) HSPCs at 1 day and (C) 2 days after CeNT treatment or conventional electroporation (n = 3; \**P* < 0.05, \*\**P* < 0.005, \*\*\*\**P* < 0.00005).

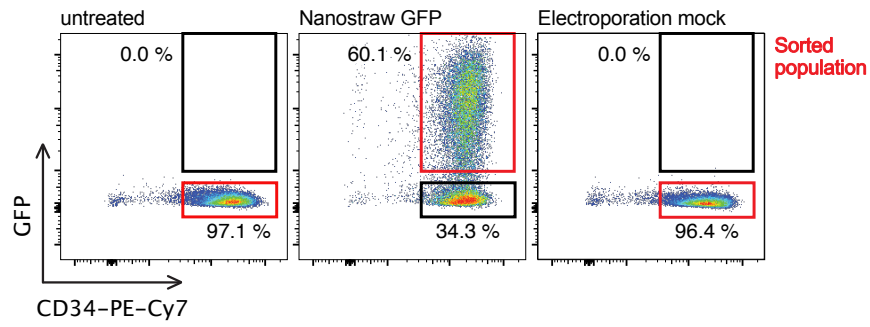

**Figure S4.** Representative FACS plots showing the populations (CD34<sup>+</sup>GFP<sup>+</sup> or CD34<sup>+</sup>GFP<sup>-</sup>) that were sorted for the transplantation experiment. The gates of the sorted populations are highlighted in red.
